# Supplementary material
Source: MDPI journal article supplement (https://www.mdpi.com/2073-4441/14/12/1867)
Supplement: s1 [file s1]

**Effect of ecosystem degradation on the source of particulate organic matter in a karst lake:**

**A case study of the Caohai Lake, China**

Jiayi Wu<sup>1,2</sup>, Haiquan Yang<sup>2\*</sup>, Wei Yu<sup>2,3</sup>, Chao Yin<sup>2</sup>, Yun He<sup>2,4</sup>, Zheng Zhang<sup>2</sup>, Dan Xu<sup>2</sup>, Qingguang Li<sup>1</sup>, Jingan Chen<sup>2</sup>

1. College of Resources and Environmental Engineering, Guizhou University, Guiyang 550025, PR China

2. State Key Laboratory of Environmental Geochemistry, Institute of Geochemistry, Chinese Academy of Sciences, Guiyang 550081, PR China

3. School of Geographic and Environmental Sciences, Guizhou Normal University, Guiyang 550025, PR China

4. College of Eco-Environmental Engineering, Guizhou Minzu University, Guiyang 550025, PR China

## ***Supporting information***

### **Supplementary Figures and Table**

**Figure S1** Photos of Caohai Lake before and after ecosystem degradation between 2019 and 2021.

**Figure S2** Contribution percentages (%) of sediment, submerged macrophytes, algae, and C3 plants to POM in the water of Caohai Lake. W and D represent the wet season and dry season, respectively.

**Table S1** Hydrochemical parameters of the lake's water (T, DO, EC, and pH), concentrations of POC, PON,  $\delta^{13}\text{C}_{\text{POC}}$ , and  $\delta^{15}\text{N}_{\text{PON}}$  in Caohai Lake during the wet season and dry season in 2019.

**Table S2** Hydrochemical parameters of the lake's water (T, DO, EC, and pH), concentrations of POC, PON,  $\delta^{13}\text{C}_{\text{POC}}$ ,  $\delta^{15}\text{N}_{\text{PON}}$  in Caohai Lake during the wet season and dry season in 2021.

**Table S3** Relative contribution percentages (%) of sediment, submerged macrophytes, algae, and C3 plants to POM in the water of Caohai Lake in 2019.

**Table S4** Relative contribution percentages (%) of sediment, submerged macrophytes, algae, and C3 plants to POM in the water of Caohai Lake in 2021.

**Table S5** The  $\delta^{13}\text{C}$  and  $\delta^{15}\text{N}$  (‰) of sediment (n=10) and submerged macrophytes (n=5) of Caohai Lake.

**Table S6** The  $\delta^{13}\text{C}_{\text{DIC}}$  (‰) in the water of Caohai Lake during the wet season and dry season in 2019.

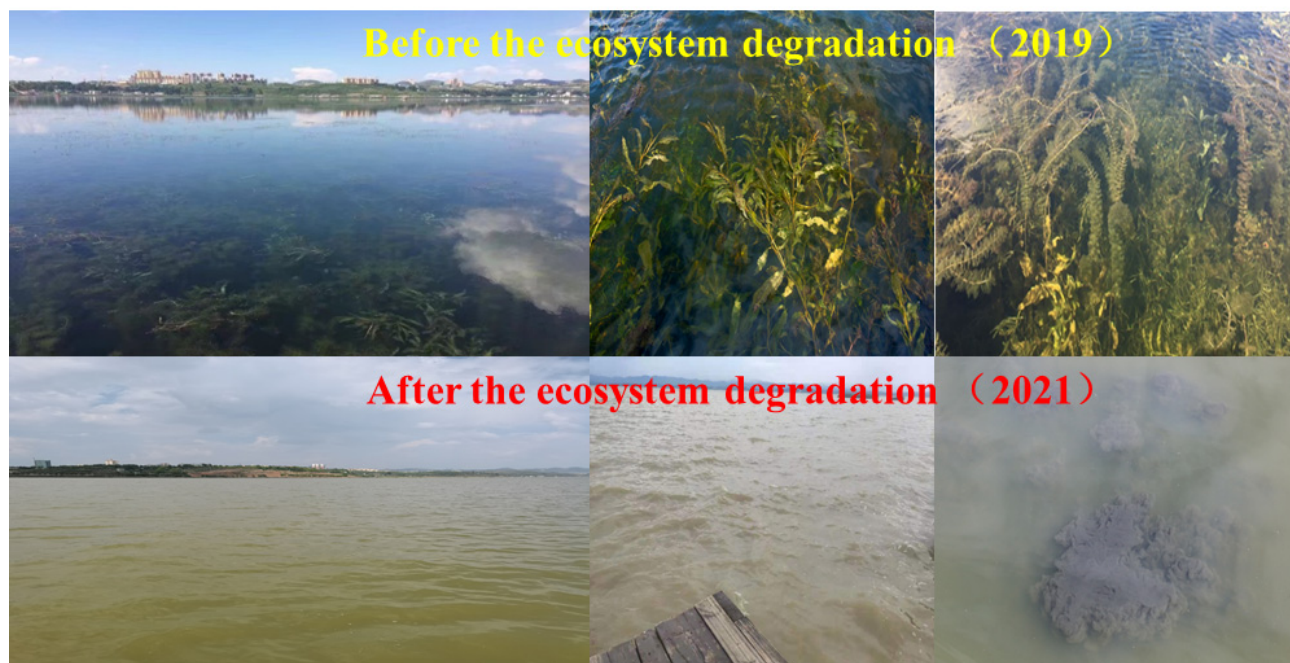

**Figure S1** Photos of Caohai Lake before and after ecosystem degradation between 2019 and 2021

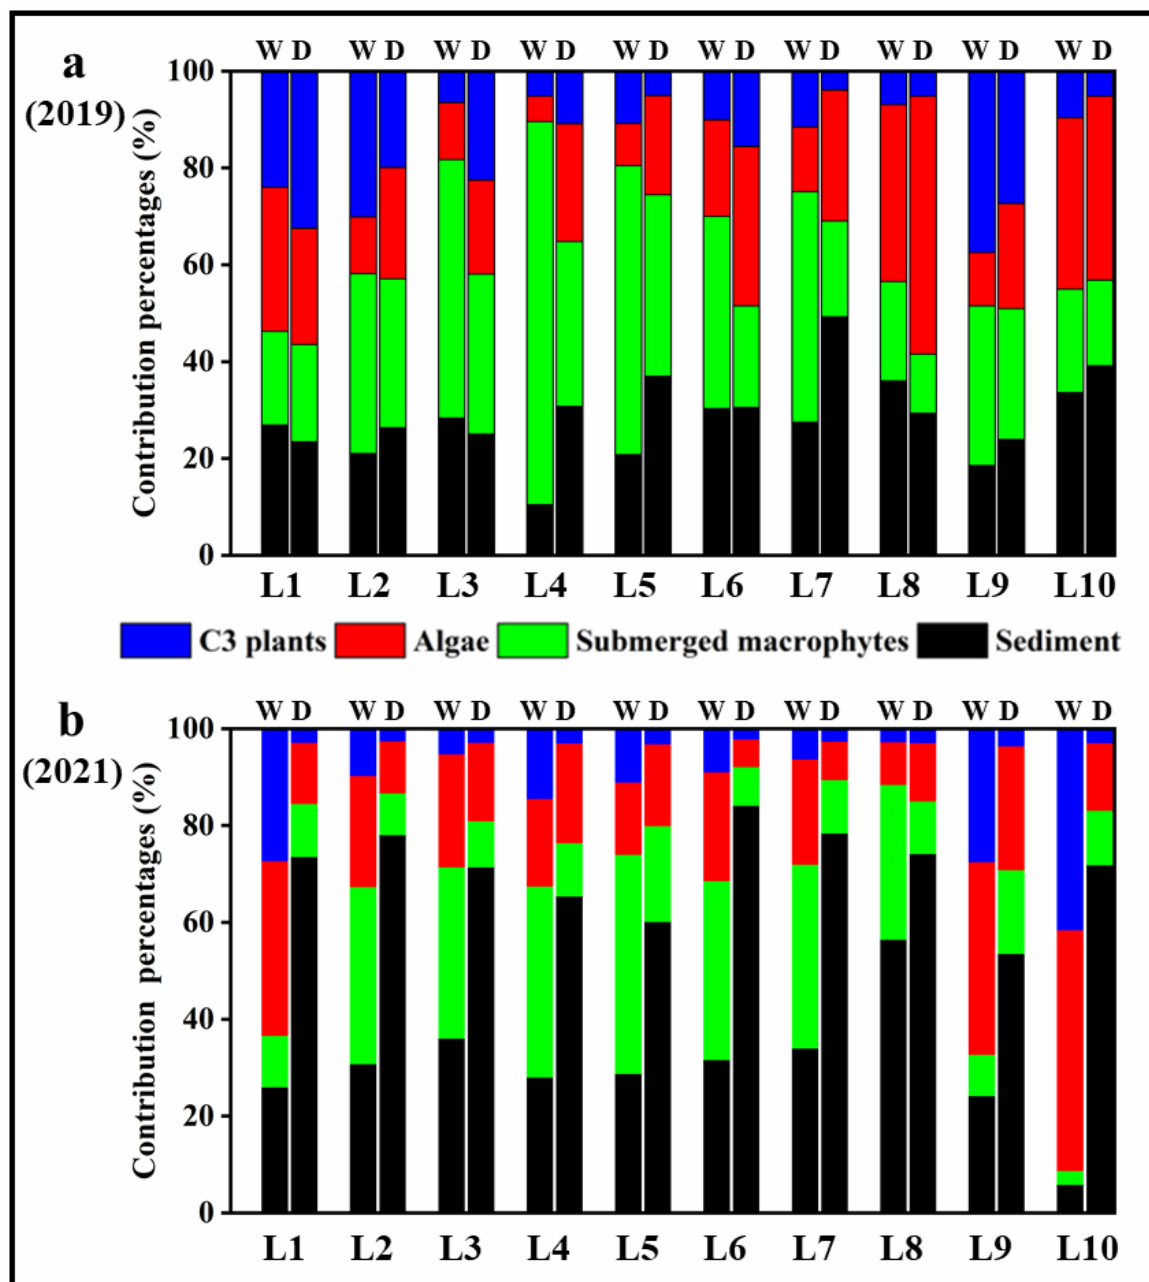

**Figure S2** Contribution percentages (%) of sediment, submerged macrophytes, algae, and C3 plants to POM before (a) and after (b) ecosystem degradation in the water of Caohai Lake. W and D represent the wet season and dry season, respectively.

**Table S1** Hydrochemical parameters of the lake's water (temperature, DO, EC, and pH), concentrations of POC, PON,  $\delta^{13}\text{C}_{\text{POC}}$ , and  $\delta^{15}\text{N}_{\text{PON}}$  in Caohai Lake during the wet season and dry season in 2019.

| Season     | Sample NO. | T (°C) | DO (mg/L) | EC (mS/cm) | pH   | POC (mg/L) | $\delta^{13}\text{C}_{\text{POC}}$ (‰) | PON (mg/L) | $\delta^{15}\text{N}_{\text{PON}}$ (‰) |
|------------|------------|--------|-----------|------------|------|------------|----------------------------------------|------------|----------------------------------------|
| Wet season | L1         | 21.6   | 15.32     | 0.351      | 8.75 | 0.94       | -25.0                                  | 0.20       | 5.0                                    |
|            | L2         | 21.9   | 6.38      | 0.351      | 8.49 | 1.00       | -21.3                                  | 0.20       | 5.0                                    |
|            | L3         | 21.1   | 10.27     | 0.320      | 8.66 | 0.99       | -19.9                                  | 0.12       | 1.9                                    |
|            | L4         | 20.4   | 9.73      | 0.325      | 8.54 | 1.62       | -16.8                                  | 0.27       | 1.1                                    |
|            | L5         | 22.2   | 7.34      | 0.320      | 8.56 | 1.66       | -18.8                                  | 0.25       | 2.4                                    |
|            | L6         | 21.4   | 8.33      | 0.387      | 8.48 | 1.21       | -21.8                                  | 0.30       | 2.8                                    |
|            | L7         | 21.5   | 6.47      | 0.353      | 8.36 | 1.12       | -20.4                                  | 0.28       | 2.8                                    |
|            | L8         | 20.5   | 6.19      | 0.420      | 8.1  | 1.36       | -25.4                                  | 0.26       | 2.6                                    |
|            | L9         | 19.3   | 9.9       | 0.376      | 8.52 | 2.43       | -21.7                                  | 0.55       | 6.0                                    |
|            | L10        | 19.6   | 5.52      | 0.408      | 8.23 | 2.69       | -25.2                                  | 0.58       | 3.1                                    |
| Dry season | L1         | 22.4   | 13.99     | 0.235      | 8.79 | 0.61       | -24.3                                  | 0.16       | 6.1                                    |
|            | L2         | 22.5   | 13.13     | 0.206      | 9.09 | 0.42       | -23.0                                  | 0.11       | 4.2                                    |
|            | L3         | 20.6   | 13.73     | 0.220      | 9.23 | 1.02       | -22.4                                  | 0.21       | 4.4                                    |
|            | L4         | 22.2   | 12.77     | 0.247      | 9.14 | 0.71       | -22.8                                  | 0.18       | 3.0                                    |
|            | L5         | 20.8   | 14.33     | 0.189      | 9.62 | 0.57       | -22.3                                  | 0.15       | 1.8                                    |
|            | L6         | 20.4   | 12.99     | 0.242      | 8.91 | 1.28       | -25.1                                  | 0.30       | 3.9                                    |
|            | L7         | 22.1   | 12.4      | 0.279      | 8.87 | 0.77       | -24.9                                  | 0.19       | 1.3                                    |
|            | L8         | 21.1   | 11.03     | 0.289      | 8.39 | 1.61       | -27.7                                  | 0.42       | 2.3                                    |
|            | L9         | 21.8   | 8.12      | 0.253      | 9.15 | 1.43       | -23.3                                  | 0.34       | 5.2                                    |
|            | L10        | 22.2   | 12.77     | 0.247      | 9.23 | 1.37       | -25.9                                  | 0.13       | 2.1                                    |

**Table S2** Hydrochemical parameters of the lake's water (temperature, DO, EC, and pH), concentrations of POC, PON,  $\delta^{13}\text{C}_{\text{POC}}$ , and  $\delta^{15}\text{N}_{\text{PON}}$  in Caohai Lake during the wet season and dry season in 2021.

| Season     | Sample NO. | T (°C) | DO (mg/L) | EC (mS/cm) | pH   | POC (mg/L) | $\delta^{13}\text{C}_{\text{POC}}$ (‰) | PON (mg/L) | $\delta^{15}\text{N}_{\text{PON}}$ (‰) |
|------------|------------|--------|-----------|------------|------|------------|----------------------------------------|------------|----------------------------------------|
| Wet season | L1         | 22.3   | 7.43      | 0.215      | 8.77 | 0.85       | -26.7                                  | 0.16       | 5.7                                    |
|            | L2         | 22.3   | 7.67      | 0.216      | 8.72 | 1.10       | -22.4                                  | 0.17       | 2.8                                    |
|            | L3         | 22.4   | 5.89      | 0.250      | 8.17 | 1.56       | -22.7                                  | 0.40       | 1.9                                    |
|            | L4         | 22.1   | 6.76      | 0.239      | 8.22 | 1.50       | -21.6                                  | 0.22       | 3.4                                    |
|            | L5         | 22.3   | 7.67      | 0.216      | 8.72 | 1.51       | -20.8                                  | 0.24       | 2.8                                    |
|            | L6         | 21.9   | 5.79      | 0.249      | 7.97 | 1.44       | -22.3                                  | 0.24       | 2.7                                    |
|            | L7         | 22.1   | 6.45      | 0.239      | 8.37 | 2.19       | -22.3                                  | 0.30       | 2.2                                    |
|            | L8         | 22.2   | 6.67      | 0.236      | 8.61 | 1.95       | -21.9                                  | 0.25       | 0.6                                    |
|            | L9         | 21.9   | 8.67      | 0.303      | 8.55 | 1.27       | -27.5                                  | 0.20       | 5.8                                    |
|            | L10        | 22.6   | 9.66      | 0.351      | 8.09 | 3.38       | -31.2                                  | 0.44       | 8.8                                    |
| Dry season | L1         | 6      | 8.02      | 0.475      | 8.28 | 1.31       | -25.1                                  | 0.25       | 0.1                                    |
|            | L2         | 5.4    | 7.85      | 0.464      | 8.34 | 1.33       | -25.5                                  | 0.24       | -0.4                                   |
|            | L3         | 6.1    | 8.23      | 0.458      | 8.35 | 1.43       | -25.9                                  | 0.34       | -0.1                                   |
|            | L4         | 5.8    | 8.29      | 0.457      | 8.39 | 1.41       | -25.9                                  | 0.23       | 0.3                                    |
|            | L5         | 5.6    | 8.02      | 0.475      | 8.28 | 1.03       | -24.0                                  | 0.22       | 0.7                                    |
|            | L6         | 6.2    | 6.32      | 0.472      | 8.14 | 1.06       | -24.7                                  | 0.28       | -1.0                                   |
|            | L7         | 5.8    | 8.23      | 0.457      | 8.34 | 1.43       | -24.4                                  | 0.24       | -0.2                                   |
|            | L8         | 5.7    | 7.36      | 0.474      | 8.23 | 1.34       | -25.1                                  | 0.23       | 0.0                                    |
|            | L9         | 6.3    | 7.63      | 0.466      | 8.19 | 1.29       | -25.1                                  | 0.30       | 1.1                                    |
|            | L10        | 6.1    | 7.46      | 0.474      | 8.23 | 1.11       | -25.2                                  | 0.19       | 0.2                                    |

**Table S3** Relative contribution percentages (%) of sediment, submerged macrophytes, algae, and C3 plants to POM in water of Caohai Lake in 2019.

| Season        | Sample | Algae | C3 plants | Sediment | Submerged macrophytes |
|---------------|--------|-------|-----------|----------|-----------------------|
| Wet<br>season | L1     | 29.75 | 23.98     | 26.89    | 19.38                 |
|               | L2     | 11.70 | 30.13     | 21.01    | 37.16                 |
|               | L3     | 11.77 | 6.54      | 28.33    | 53.36                 |
|               | L4     | 5.26  | 5.14      | 10.43    | 79.17                 |
|               | L5     | 8.69  | 10.83     | 20.82    | 59.67                 |
|               | L6     | 19.92 | 10.06     | 30.28    | 39.75                 |
|               | L7     | 13.34 | 11.57     | 27.47    | 47.62                 |
|               | L8     | 36.54 | 6.92      | 35.99    | 20.55                 |
|               | L9     | 11.03 | 37.47     | 18.51    | 32.99                 |
|               | L10    | 35.40 | 9.62      | 33.58    | 21.39                 |
| Dry<br>season | L1     | 23.95 | 32.49     | 23.47    | 20.09                 |
|               | L2     | 22.96 | 19.93     | 26.32    | 30.78                 |
|               | L3     | 19.41 | 22.52     | 25.04    | 33.03                 |
|               | L4     | 24.31 | 10.86     | 30.75    | 34.08                 |
|               | L5     | 20.46 | 5.06      | 36.96    | 37.52                 |
|               | L6     | 32.96 | 15.55     | 30.53    | 20.96                 |
|               | L7     | 27.08 | 3.90      | 49.23    | 19.79                 |
|               | L8     | 53.29 | 5.16      | 29.36    | 12.18                 |
|               | L9     | 21.72 | 27.33     | 23.90    | 27.05                 |
|               | L10    | 38.02 | 5.17      | 39.11    | 17.69                 |

**Table S4** Relative contribution percentages (%) of sediment, submerged macrophytes, algae, and C3 plants to POM in water of Caohai Lake in 2021.

| Season        | Sample | Algae | C3 plants | Sediment | Submerged macrophytes |
|---------------|--------|-------|-----------|----------|-----------------------|
| Wet<br>season | L1     | 36.08 | 27.38     | 25.92    | 10.62                 |
|               | L2     | 22.95 | 9.79      | 30.71    | 36.55                 |
|               | L3     | 23.35 | 5.35      | 35.94    | 35.37                 |
|               | L4     | 18.09 | 14.53     | 27.93    | 39.45                 |
|               | L5     | 14.93 | 11.17     | 28.69    | 45.22                 |
|               | L6     | 22.42 | 9.08      | 31.56    | 36.95                 |
|               | L7     | 21.68 | 6.43      | 33.93    | 37.96                 |
|               | L8     | 8.84  | 2.85      | 56.40    | 31.92                 |
|               | L9     | 39.72 | 27.64     | 24.06    | 8.57                  |
|               | L10    | 49.72 | 41.63     | 5.75     | 2.90                  |
| Dry<br>season | L1     | 12.58 | 2.97      | 73.47    | 10.97                 |
|               | L2     | 10.74 | 2.69      | 77.98    | 8.59                  |
|               | L3     | 16.20 | 2.93      | 71.32    | 9.56                  |
|               | L4     | 20.56 | 3.09      | 65.33    | 11.02                 |
|               | L5     | 16.90 | 3.25      | 60.07    | 19.78                 |
|               | L6     | 5.75  | 2.22      | 84.03    | 7.99                  |
|               | L7     | 7.94  | 2.71      | 78.30    | 11.04                 |
|               | L8     | 12.05 | 3.02      | 74.09    | 10.84                 |
|               | L9     | 25.56 | 3.71      | 53.43    | 17.31                 |
|               | L10    | 13.95 | 3.01      | 71.78    | 11.26                 |



**Table S5** The  $\delta^{13}\text{C}$  and  $\delta^{15}\text{N}$  (‰) of sediment (n=10) and submerged macrophytes (n=5) of Caohai Lake.

| Source                   | Sample                                      | $\delta^{13}\text{C}$ | $\delta^{15}\text{N}$ |
|--------------------------|---------------------------------------------|-----------------------|-----------------------|
|                          |                                             | (‰)                   | (‰)                   |
| Sediment                 | L1                                          | -22.9                 | 5.3                   |
|                          | L2                                          | -25.5                 | 4.3                   |
|                          | L3                                          | -20.4                 | 3.1                   |
|                          | L4                                          | -22.4                 | 2.0                   |
|                          | L5                                          | -25.0                 | 3.1                   |
|                          | L6                                          | -20.7                 | 2.6                   |
|                          | L7                                          | -25.2                 | 2.6                   |
|                          | L8                                          | -23.2                 | 2.8                   |
|                          | L9                                          | -24.3                 | 5.1                   |
|                          | L10                                         | -23.1                 | 2.6                   |
| Submerged<br>macrophytes | <i>Potamogeton lucens</i> L.                | -13.5                 | -0.6                  |
|                          | <i>Myriophyllum verticillatum</i> L.        | -15.0                 | -0.1                  |
|                          | <i>Potamogeton wrightii</i> Morong          | -15.2                 | -0.2                  |
|                          | <i>Potamogeton maackianus</i> A.<br>Bennett | -15.4                 | 0.3                   |
|                          | <i>Najas graminea</i> Del                   | -15.4                 | 0.4                   |

**Table S6** The  $\delta^{13}\text{C}_{\text{DIC}}$  (‰) in the water of Caohai Lake during the wet season and dry season in 2019.

| Season        | Sample | $\delta^{13}\text{C}_{\text{DIC}}$<br>(‰) |
|---------------|--------|-------------------------------------------|
| Wet<br>season | L1     | -9                                        |
|               | L2     | -15.7                                     |
|               | L3     | -13.8                                     |
|               | L4     | -10.9                                     |
|               | L5     | -13                                       |
|               | L6     | -9.1                                      |
|               | L7     | -6.8                                      |
|               | L8     | -6.3                                      |
|               | L9     | -3.7                                      |
|               | L10    | -7.5                                      |
| Dry<br>season | L1     | -4.9                                      |
|               | L2     | -3                                        |
|               | L3     | 0.6                                       |
|               | L4     | -0.3                                      |
|               | L5     | -3.5                                      |
|               | L6     | -2.7                                      |
|               | L7     | -0.5                                      |
|               | L8     | -2.4                                      |
|               | L9     | -2.6                                      |
|               | L10    | -0.8                                      |
